# Supplementary material for: Responses to 2009 H1N1 Vaccine in Children 3 to 17 Years of Age
Source: Atypon-hosted journal article supplement (doi:10.1056/nejmc0909988), 2009-12-30
Supplement: nejm_arguedas_370sa1.pdf [file nejm_arguedas_370sa1.pdf]

## Supplementary Appendix

This appendix has been provided by the authors to give readers additional information about their work.

Supplement to: Arguedas A, Soley C, Lindert K. Responses to 2009 H1N1 vaccine in children 3 to 17 years of age. *N Engl J Med* 2010;362:370-2. DOI: 10.1056/NEJMc0909988.

**Supplementary Table 1.**

Local reactions to A(H1N1) 2009 vaccines.

|                                  | Age group  |           |           |            |           |           |    |
|----------------------------------|------------|-----------|-----------|------------|-----------|-----------|----|
|                                  | 3-8 years  |           |           | 9-17 years |           |           |    |
| <b>HA dose (µg)</b>              | <b>7.5</b> | <b>15</b> | <b>30</b> | <b>7.5</b> | <b>15</b> | <b>30</b> |    |
| <b>MF59 adjuvant</b>             | Yes        | No        | No        | Yes        | No        | No        |    |
| <b>N =</b>                       | 54         | 83        | 53        | 52         | 83        | 57        |    |
| <b>% with any local reaction</b> | 47         | 37        | 39        | 70         | 45        | 49        |    |
| <b>% with specific reactions</b> |            |           |           |            |           |           |    |
| <b>Erythema</b>                  | Any        | 6         | 1         | 0          | 2         | 5         | 2  |
|                                  | Severe     | 0         | 0         | 0          | 0         | 0         | 0  |
| <b>Induration</b>                | Any        | 15        | 5         | 4          | 6         | 11        | 7  |
|                                  | Severe     | 0         | 0         | 0          | 0         | 0         | 0  |
| <b>Swelling</b>                  | Any        | 15        | 4         | 6          | 6         | 10        | 6  |
|                                  | Severe     | 0         | 0         | 0          | 0         | 0         | 0  |
| <b>Pain</b>                      | Any        | 54        | 45        | 42         | 73        | 53        | 58 |
|                                  | Severe     | 2         | 1         | 2          | 2         | 1         | 0  |

## Supplementary Table 2.

Systemic reactions to A(H1N1) 2009 vaccines.

|                                     |               | Age group |    |     |            |    |    |
|-------------------------------------|---------------|-----------|----|-----|------------|----|----|
|                                     |               | 3-8 years |    |     | 9-17 years |    |    |
| HA dose ( $\mu\text{g}$ )           | 7.5           | 15        | 30 | 7.5 | 15         | 30 |    |
|                                     | MF59 adjuvant | Yes       | No | No  | Yes        | No | No |
| <b>N =</b>                          | 54            | 83        | 53 | 52  | 83         | 57 |    |
| <b>% with any systemic reaction</b> | 35            | 31        | 26 | 45  | 42         | 26 |    |
| <b>% with specific reactions</b>    |               |           |    |     |            |    |    |
| <b>Headache</b>                     | Any           | 13        | 14 | 17  | 31         | 23 | 14 |
|                                     | Severe        | 0         | 0  | 0   | 0          | 0  | 0  |
| <b>Fatigue</b>                      | Any           | 11        | 10 | 9   | 17         | 16 | 19 |
|                                     | Severe        | 0         | 0  | 0   | 0          | 1  | 2  |
| <b>Myalgia</b>                      | Any           | 7         | 10 | 11  | 19         | 17 | 19 |
|                                     | Severe        | 0         | 0  | 0   | 0          | 2  | 0  |
| <b>Arthralgia</b>                   | Any           | 0         | 2  | 4   | 4          | 2  | 0  |
|                                     | Severe        | 0         | 0  | 2   | 0          | 0  | 0  |
| <b>Chills</b>                       | Any           | 6         | 1  | 4   | 2          | 2  | 2  |
|                                     | Severe        | 0         | 0  | 0   | 0          | 0  | 0  |
| <b>Nausea</b>                       | Any           | 9         | 8  | 8   | 6          | 8  | 9  |
|                                     | Severe        | 0         | 0  | 0   | 0          | 0  | 0  |
| <b>Vomiting</b>                     | Any           | 0         | 1  | 4   | 0          | 1  | 0  |
|                                     | Severe        | 0         | 0  | 0   | 0          | 0  | 0  |
| <b>Diarrhea</b>                     | Any           | 0         | 0  | 2   | 4          | 0  | 0  |
|                                     | Severe        | 0         | 0  | 0   | 0          | 0  | 0  |
| <b>Fever</b>                        | 38°–40°C      | 11        | 4  | 9   | 0          | 1  | 4  |
|                                     | > 40°C        | 0         | 0  | 0   | 0          | 0  | 0  |
